# Supplementary material for: Thermopriming triggers splicing memory in Arabidopsis
Source: PubMed Central journal article supplement (PMC5920379; doi:10.1093/jxb/ery062), 2018-02-27
Supplement: ery062_suppl_supplementary_figures-and-tables.pdf [file ery062_suppl_supplementary_figures-and-tables.pdf]

**A**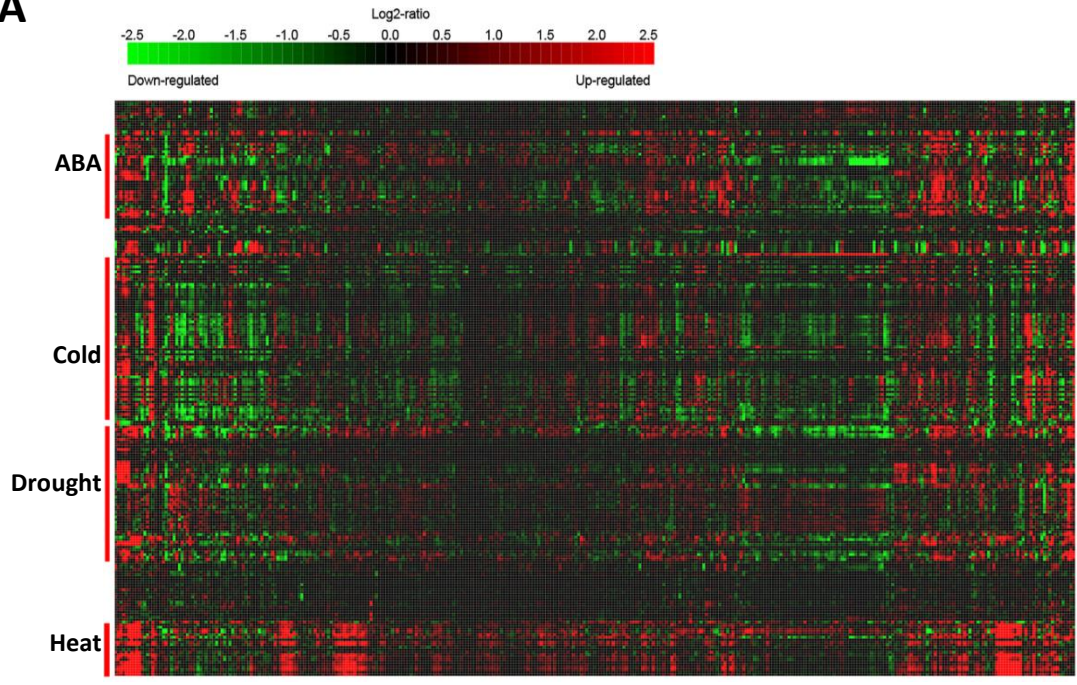**B**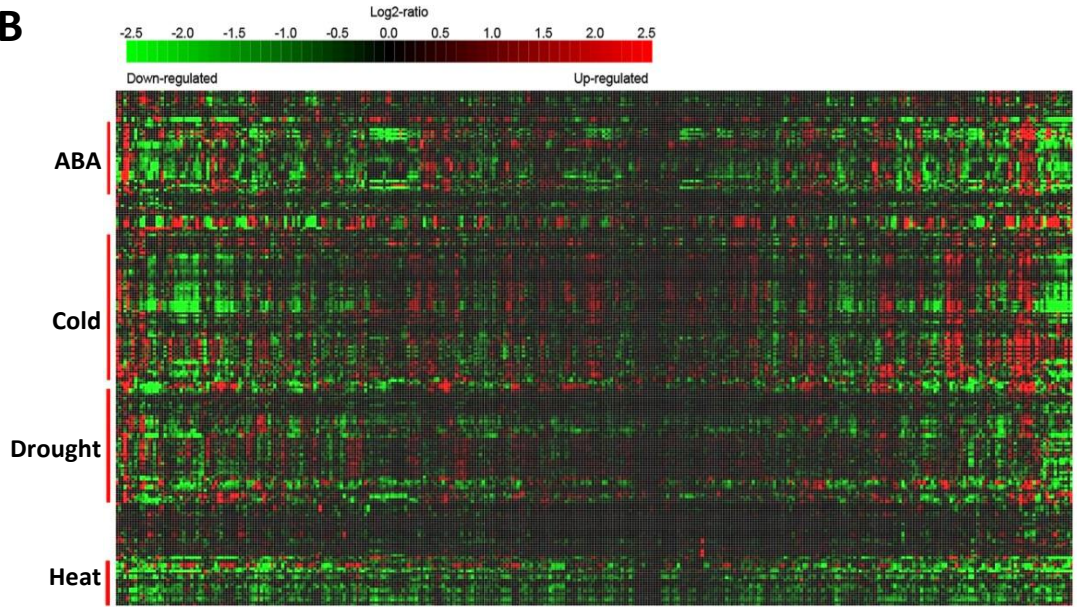

**Supplementary Figure 1. Gene expression Changed by heat stress in our study correspond to earlier studies.** The heatmaps were generated by mapping the heat responsive genes defined by RNA-seq data to the microarray database using Genevestigator. The heatmaps indicate that the heat responsive genes are consistent with previous microarray experiment. A, up-regulated genes. B, down-regulated genes.



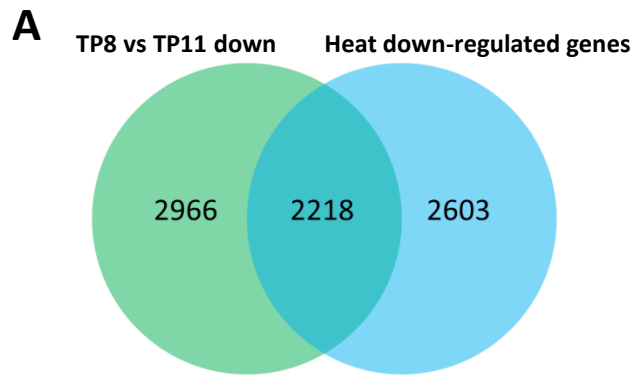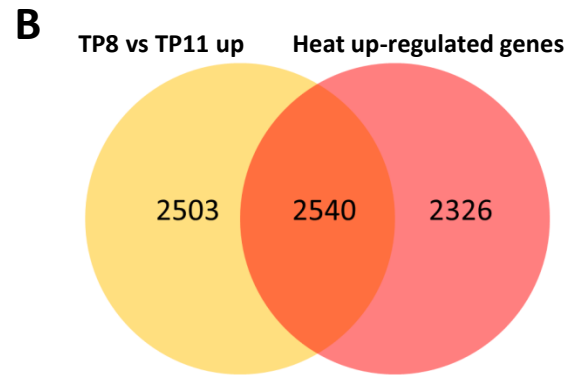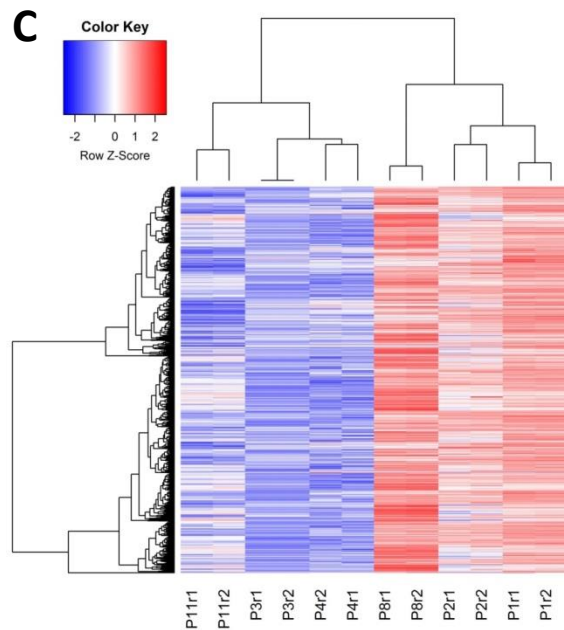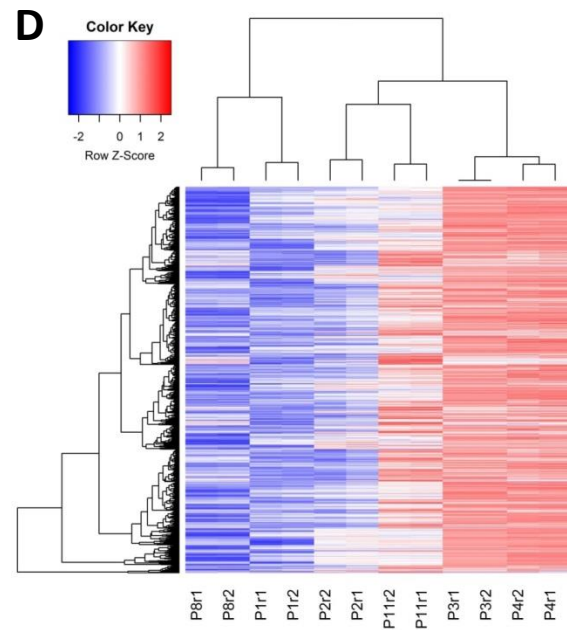

**Supplementary Figure 3. Comparisons of the DEGs between primed vs non-primed plants in 2d after heat shock (TP8 vs TP11) and heat-responsive genes (TP2TP3TP4 vs TP1).** A and B show down-regulated (A) and up-regulated (B) genes in TP11 overlapping to heat-responsive genes, respectively. C and D, The clustering of expression profiles of the heat responsive genes whose expression can not be returned in non-primed plants after heat shock (TP11). C, heat down-regulated genes, D, heat up-regulated genes.

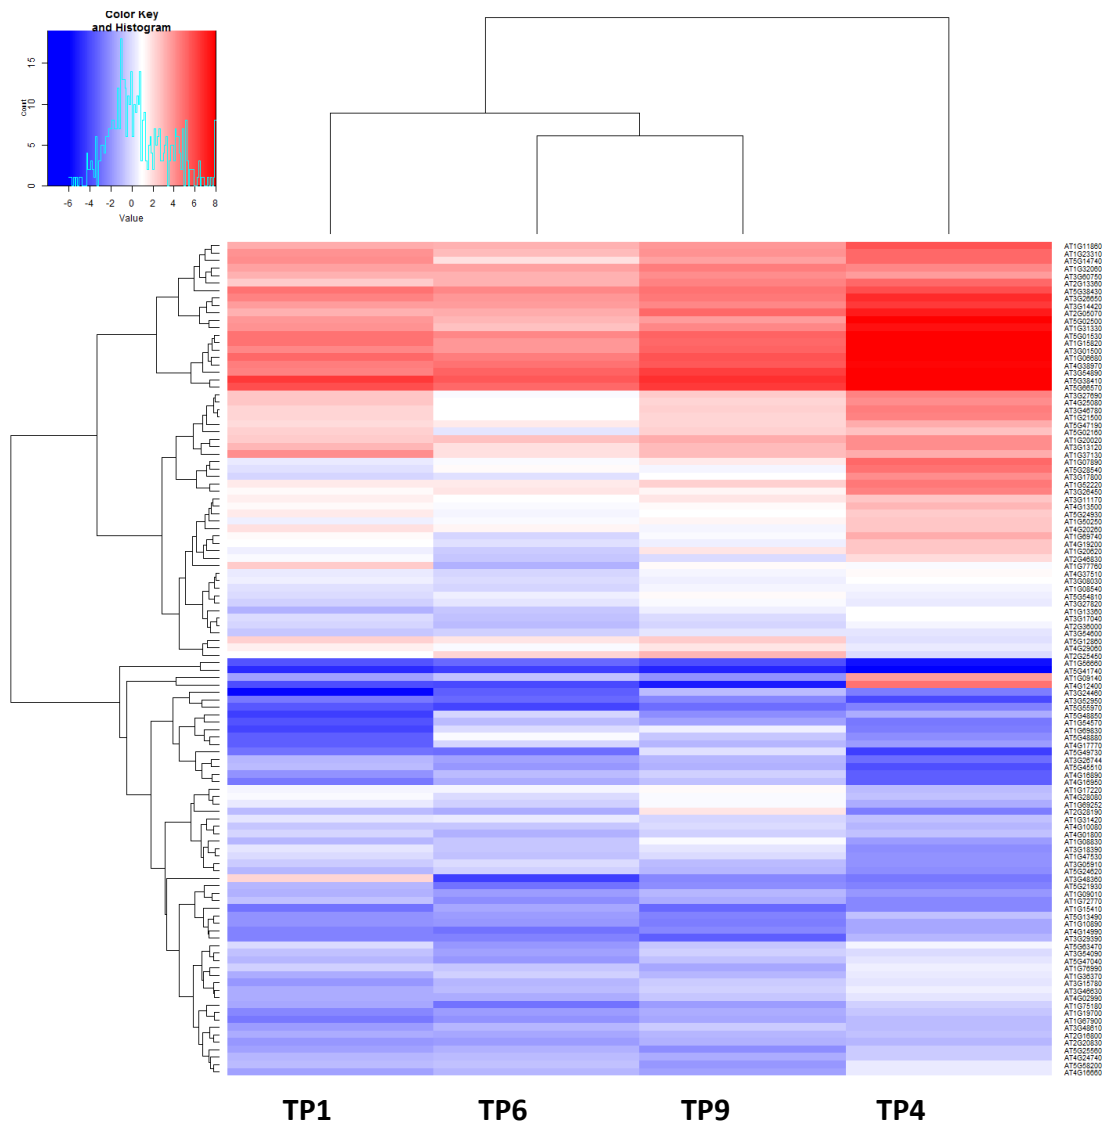

**Supplementary Figure 4. Gene expression pattern of heat priming memory-related DEGs and DIR related genes.** Expression patterns of 124 genes which are differentially express and also possess differentially expressed intron(s) in both heat priming phases (TP4) and recovery phases (TP6).

**A**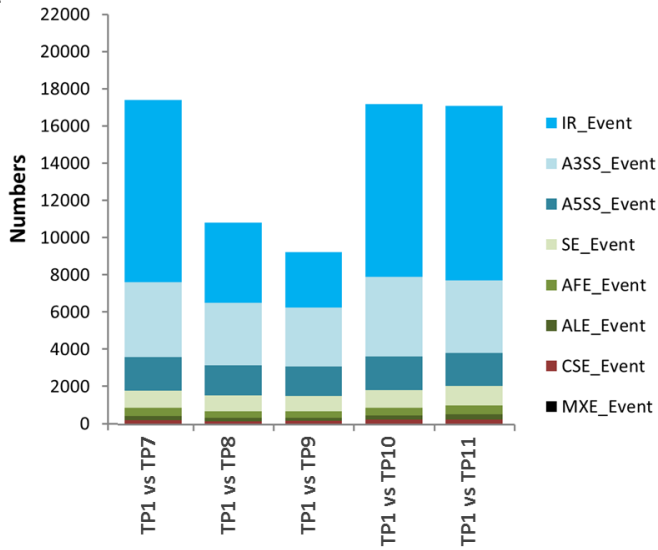**B**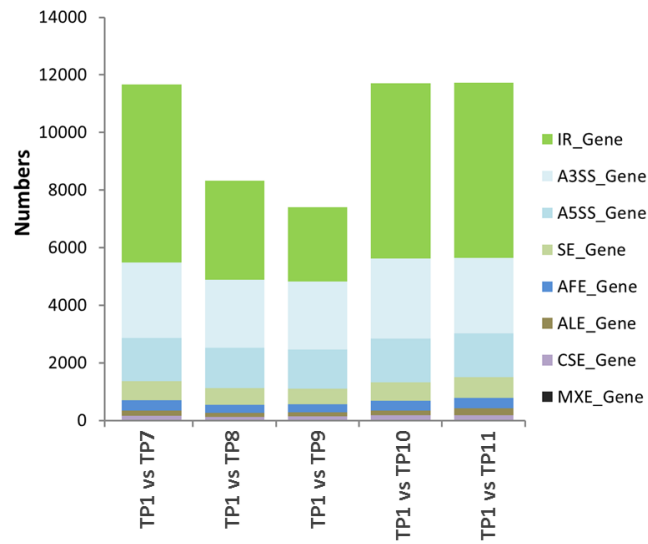

**Supplementary Figure 5. Differential AS events and genes between primed and non-primed plants.** A, Column plots show the number of differential AS events from primed and non-primed plants under lethal heat shock and recovery 2d. B, Column plots show numbers of genes that contain differential AS events from primed and non-primed plants under lethal heat shock and recovery 2d. During lethal heat shock phase, the numbers of differential AS events / -related genes are similar between primed and non-primed plants (see TP1 vs TP7 and TP1 vs TP10 in A and B), and the numbers of differential AS events / -related genes in primed plants drop down closed to control level (see TP1 vs TP8, TP1 vs TP7 and TP1 vs TP9 in A and B), whereas the number in non-primed plant stay the same as that of heat shock plants (see TP1 vs TP10, TP1 vs TP9 and TP1 vs TP11 in A and B).

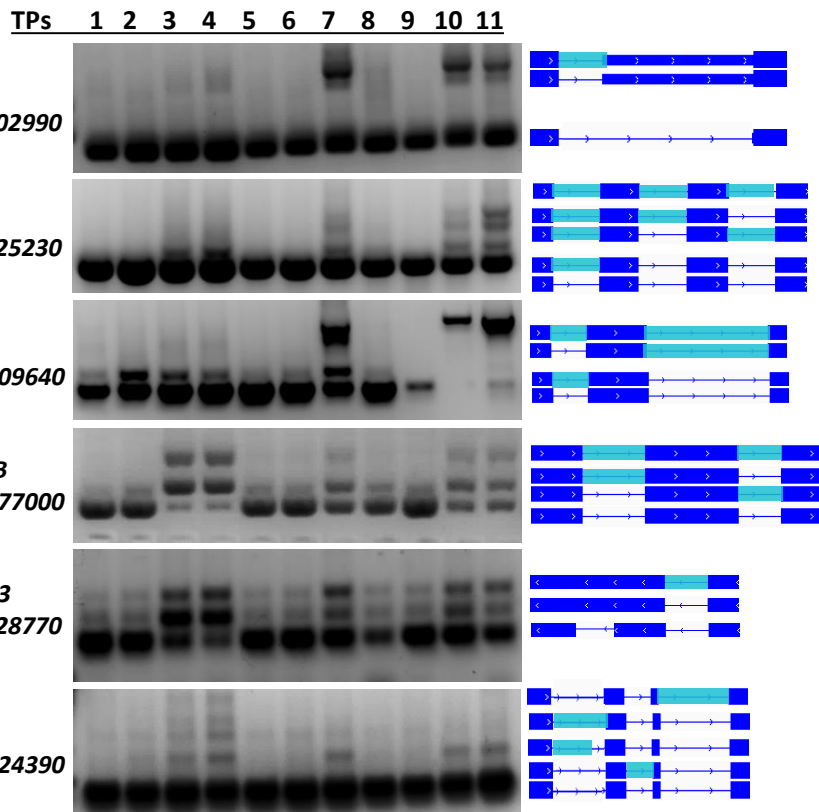

**Supplementary Figure 6. splicing pattern of heat-responsive genes.** RT-PCR was performed using primers that flank introns. One or more isoforms of genes are expressed at different time points (TPs). The gene structure flanking the amplified fragments and the structures of regulated variants are shown beside the gel images. Blue box, exon; narrow blue box, 3' or 5' UTR; line, spliced intron; light blue, retained intron. These genes tend to express more intron retained isoforms in TP 3, TP4, TP7, TP10 and TP11. Genes have different ratio of intron retention in heat priming and heat shock. *FES1α*, *ROF1* and *APX2* expressed less intron retained isoforms in heat priming (TP 3 and TP4), when compared to that of heat shock (TP 7 and TP10). *SKP2B*, *BZIP63* and *AFB4* expressed more intron retained isoforms in heat priming, when compared to that of heat shock.

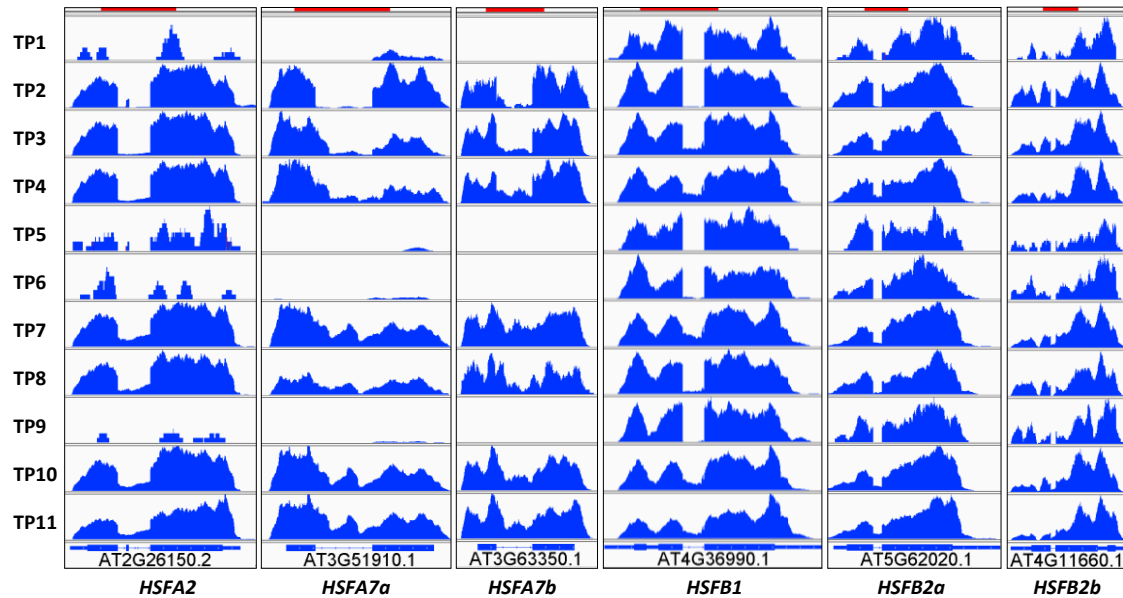

**Supplementary Figure 7. IGV images of HSF genes.** The gene structure and intron retention of interesting regions from these 6 HSF genes are shown from the IGV program. Coverage of RT-PCR amplified fragments are shown on the top of each panel (red bar).

**Supplementary Table 1: The annotated AS events**

| Type                       | IR     | A3SS  | A5SS | SE   | AFE  | ALE | CSE | MXE |
|----------------------------|--------|-------|------|------|------|-----|-----|-----|
| TAIR10.gff                 | 127555 | 2243  | 1220 | 739  | 679  | 323 | 102 | 18  |
| TAIR10.gff+novel junctions | 127555 | 19577 | 6574 | 5264 | 2173 | 843 | 956 | 19  |
| Events                     | 38131  | 12319 | 5535 | 3655 | 2103 | 771 | 678 | 18  |

IR: intron retention, A3SS: alternative 3' splice sites, A5SS: alternative 5' splice sites, SE, skipping exon, AFE: alternative first exons, ALE: alternative last exons, CSE: coordinated skipping exons, MXE: mutually exclusive exons.

**Supplementary Table 2: AS events and related genes in different time points**

| Samples | AS events | Related genes | Intron-containing genes (%) |
|---------|-----------|---------------|-----------------------------|
| TP1     | 32724     | 11817         | 53.33                       |
| TP2     | 28277     | 10775         | 45.52                       |
| TP3     | 35138     | 11095         | 50.13                       |
| TP4     | 31825     | 10357         | 46.8                        |
| TP5     | 30304     | 11275         | 50.95                       |
| TP6     | 31892     | 11679         | 52.77                       |
| TP7     | 37318     | 11967         | 54.07                       |
| TP8     | 35995     | 12262         | 55.41                       |
| TP9     | 32306     | 11783         | 53.24                       |
| TP10    | 38629     | 12139         | 54.85                       |
| TP11    | 36676     | 11981         | 54.14                       |



**Supplementary Table 3: The list of genes contain differential intron retention between TP2, 3 , 4 and 6, compared to TP1 and 9**

| Genes with more intron in TP2, 3, 4, and 6, compared to TP1 and 9 | Genes with less intron in TP2, 3, 4, and 6, compared to TP1 and 9 |
|-------------------------------------------------------------------|-------------------------------------------------------------------|
| AT5G04550                                                         | AT2G36000                                                         |
| AT4G25080                                                         | AT4G31877                                                         |
| AT5G45510                                                         | AT5G02500                                                         |
| AT4G10730                                                         | AT2G32480                                                         |
| AT1G76490                                                         | AT1G69252                                                         |
| AT4G31550                                                         | AT1G22140                                                         |
| AT4G02500                                                         | AT1G78865                                                         |
| AT5G49730                                                         | AT3G16400                                                         |
| AT4G20940                                                         |                                                                   |
| AT1G53910                                                         |                                                                   |
| AT1G61180                                                         |                                                                   |
| AT1G77460                                                         |                                                                   |
| AT5G08335                                                         |                                                                   |
| AT4G31550                                                         |                                                                   |
| AT5G25280                                                         |                                                                   |
| AT2G45340                                                         |                                                                   |
| AT4G39090                                                         |                                                                   |
| AT3G52800                                                         |                                                                   |
| AT1G13190                                                         |                                                                   |
| AT3G56860                                                         |                                                                   |
| AT1G63880                                                         |                                                                   |
| AT5G50960                                                         |                                                                   |
| AT3G16000                                                         |                                                                   |
| AT5G16110                                                         |                                                                   |
| AT4G01950                                                         |                                                                   |
| AT1G08540                                                         |                                                                   |
| AT1G37130                                                         |                                                                   |
| AT1G53910                                                         |                                                                   |
